# Supplementary material for: Organoaluminium complexes incorporating an amido phosphine chelate with a pendant amine arm
Source: Royal Society of Chemistry journal article supplement (doi:10.1039/b502873f), 2005-01-01
Supplement: b502873f.pdf [file b502873f.pdf]

**Organoaluminum Complexes Incorporating an Amido Phosphine Chelate with a  
Pendant Amine Arm**

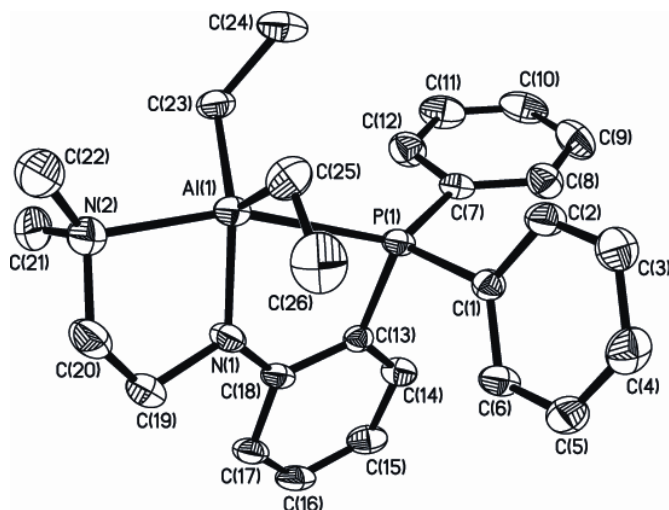

**Figure S1.** Molecular structure of [PNN]AlEt<sub>2</sub> with thermal ellipsoids drawn at the 35% probability level.

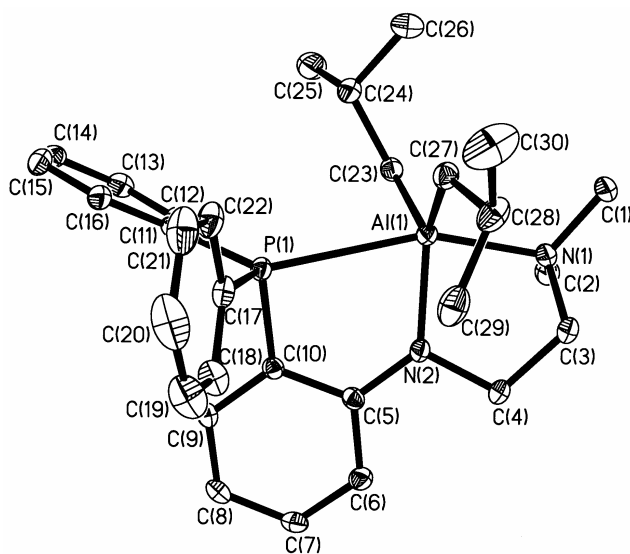

**Figure S2.** Molecular structure of [PNN]Al(*i*-Bu)<sub>2</sub> with thermal ellipsoids drawn at the 35% probability level.
